# Supplementary material for: Long-term Recovery of Retinal Structure and Function in Vogt-Koyanagi-Harada Disease: A 5-Year Follow-up Study Using Adaptive Optics Imaging and Fundus Microperimetry
Source: Research Square preprint supplement (doi:10.21203/rs.3.rs-6175565/v1), 2025-03-25
Supplement: Supplementary file 1 [file dc62952eeedc98bd81fd7f2b.docx]

**Supplementary Material**

**Supplementary Tables:**

**Supplementary Table S1. Changes in mean cone density over time in all VKH eyes (n=25)**

| **Time point** | **Mean cone density (cones/mm²)** | **p-value*** |
| --- | --- | --- |
| Baseline (SRD resolution) | 12435 ± 3905 | − |
| 6 months | 15793 ± 4195 | p < 0.001 |
| 1 year | 17464 ± 3940 | p < 0.001 |
| 2 years | 20471 ± 3224 | p < 0.001 |
| 3 years | 21736 ± 2571 | p < 0.001 |
| 5 years | 22212 ± 2845 | p < 0.001 |

Values are presented as mean ± standard deviation. *p-values represent comparison with baseline. **Abbreviations**: VKH, Vogt-Koyanagi-Harada disease; SRD, serous retinal detachment.

**Supplementary Table S2. Comparison of cone density between eyes With or Without cystoid spaces**

| **Time point** | **Without  cystoid spaces**  **(n = 13)** | **With  cystoid spaces**  **(n = 12)** | **p-value** |
| --- | --- | --- | --- |
| Baseline (SRD resolution) | 15142 ± 2453 | 9276 ± 2714 | p < 0.001 |
| 6 months | 18682 ± 2567 | 12663 ± 3265 | p < 0.001 |
| 1 year | 20005 ± 2677 | 14710 ± 3186 | p < 0.001 |
| 2 years | 21697 ± 2937 | 19143 ± 3094 | p = 0.045 |
| 3 years | 22253 ± 2803 | 21177 ± 2279 | NS |
| 5 years | 22605 ± 3038 | 21787 ± 2685 | NS |

Values are presented as mean ± standard deviation (cones/mm²). **Abbreviations**: SRD, serous retinal detachment; NS, Not significant.

**Supplementary Table S3. Changes in Macular Integrity and Average Threshold over time in VKH Patients**

**Macular Integrity**

| **Time point** | **Number of eyes** | **Mean ± SD** | **p-value*** |
| --- | --- | --- | --- |
| Baseline (SRD resolution) | 17 | 56.0 ± 27.6 | − |
| 6 months | 23 | 58.3 ± 32.6 | NS |
| 1 year | 25 | 47.6 ± 28.3 | NS |
| 2 years | 25 | 28.5 ± 28.8 | p = 0.042 |
| 3 years | 25 | 24.1 ± 21.9 | p = 0.027 |
| 5 years | 21 | 22.5 ± 25.9 | p = 0.018 |

**Average Threshold**

| **Time point** | **Number of eyes** | **Mean ± SD (dB)** | **p-value*** |
| --- | --- | --- | --- |
| Baseline (SRD resolution) | 17 | 26.4 ± 1.6 | − |
| 6 months | 23 | 28.1 ± 1.6 | p = 0.001 |
| 1 year | 25 | 27.6 ± 1.6 | p = 0.022 |
| 2 years | 25 | 29.1 ± 1.2 | p < 0.001 |
| 3 years | 25 | 29.1 ± 0.9 | p = 0.002 |
| 5 years | 21 | 29.3 ± 1.1 | p < 0.001 |

Values are presented as mean ± standard deviation. *p-values represent comparison with baseline. **Abbreviations**: VKH, Vogt-Koyanagi-Harada disease; SRD, serous retinal detachment. ; NS, Not significant.

**Supplementary Table S4. Comparison of Macular Integrity and Average Threshold between eyes With or Without cystoid spaces**

**Macular Integrity**

| **Time point** | **Without  cystoid spaces** | **With  cystoid spaces** | **p-value** |
| --- | --- | --- | --- |
| Baseline (SRD resolution) | 46.3 ± 31.1 (n = 9) | 66.9 ± 19.4 (n = 8) | NS |
| 6 months | 48.8 ± 32.2 (n = 11) | 66.9 ± 32.4 (n = 12) | NS |
| 1 year | 45.4 ± 30.9 (n = 13) | 50.0 ± 26.2 (n = 12) | NS |
| 2 years | 35.2 ± 34.4 (n = 13) | 21.2 ± 20.2 (n = 12) | NS |
| 3 years | 30.2 ± 24.5 (n = 13) | 17.4 ± 17.1 (n = 12) | NS |
| 5 years | 24.0 ± 27.8 (n = 13) | 20.1 ± 23.9 (n = 8) | NS |

**Average Threshold**

| **Time point** | **Without  cystoid spaces**  (dB) | **With  cystoid spaces**  (dB) | **p-value** |
| --- | --- | --- | --- |
| Baseline (SRD resolution) | 27.3 ± 1.7 (n = 9) | 25.5 ± 0.8 (n = 8) | p = 0.014 |
| 6 months | 28.7 ± 1.4 (n = 11) | 27.6 ± 1.6 (n = 12) | p = 0.043 |
| 1 year | 28.1 ± 1.3 (n = 13) | 27.0 ± 1.7 (n = 12) | p = 0.045 |
| 2 years | 29.0 ± 1.3 (n = 13) | 29.2 ± 1.0 (n = 12) | NS |
| 3 years | 29.0 ± 0.9 (n = 13) | 29.1 ± 1.0 (n = 12) | NS |
| 5 years | 29.2 ± 1.0 (n = 13) | 29.4 ± 1.4 (n = 8) | NS |

Values are presented as mean ± standard deviation (cones/mm²). **Abbreviations**: SRD, serous retinal detachment; NS, Not significant.

**Supplementary Video Legends:**

**Supplementary Video S1.** Time-lapse observation by adaptive optics imaging of recovery of cone photoreceptors over 5 years (Same eye as in figure 4). (13 frames, 1 fps; image size 1.2 mm×1.2 mm)
